# Supplementary material
Source: Springer Nature journal article supplement (https://www.springermedizin.de/resource/supplementary/12985_2014_2444_MOESM1_ESM.pdf/9606750)

A

HHRz

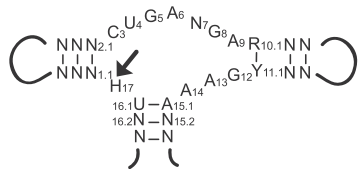

B

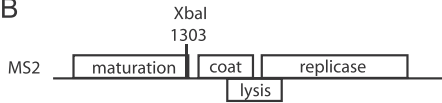

C

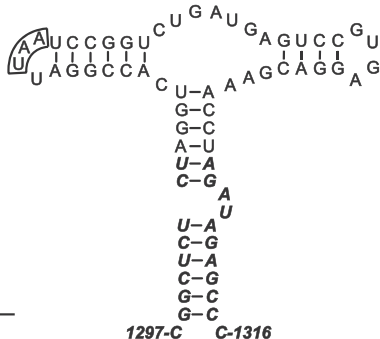

D

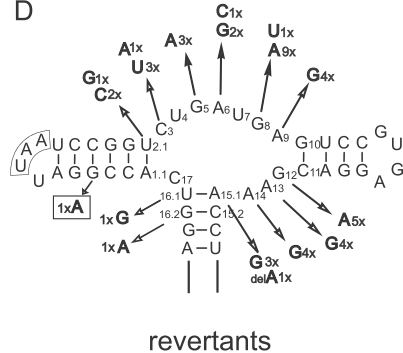

Supplement: MOESM1 [file 9606750]
